# Supplementary material
Source: HighWire-hosted journal article supplement (https://bmjopen.bmj.com/content/7/11/e018578)
Supplement: inline-supplementary-material-2 [file inline-supplementary-material-2.pdf]

## **Additional file 2: Quality assessment**

### **External validity**

#### **1. Was the sampling frame a true or close representation of the target population?**

Yes: All patients registered in paediatric diabetes units or clinics, i.e. general population of children and young people living with diabetes.

No: Participants selected only among screening attenders, voluntary participants of diabetes summer camps or other events.

#### **2. Are the study subjects described in detail regarding?**

Yes: Age or diabetes duration was reported along with a measure of diabetes control and the year(s) when the study was conducted.

No: One or more of the previous details was not described.

#### **3. Was some form of consecutive, random selection used to select the sample, OR was a census undertaken?**

Yes: Yes.

No: No or unclear.

#### **4. Was the likelihood of nonresponse bias minimal?**

Yes: Response >50%.

No: Unclear, not reported, or less 50%.

### **Internal validity**

#### **5. Were data collected directly from the subjects (as opposed to a proxy)?**

Yes: Cross-sectional and prospective studies, retrospective analysis of prospective databases e.g. diabetic retinopathy screening registers.

No: Retrospective analysis of medical records.

#### **6. Was an acceptable case definition used in the study?**

Yes: Internationally acceptable (DCCT compliant) taxonomy of diabetic retinopathy was used.

No: No clear definition of diabetic retinopathy, e.g. *retinal changes*, or the severity of cases was not described.

#### **7. Was the study instrument that measured the parameter of interest shown to have validity and reliability?**

Yes: Retinal photographs or fluorescein angiogram.

No: Fundoscopy or ophthalmoscopy alone.

**8. Was the same mode of data collection used for all subjects?**

Yes: all participants received the same diagnostic test including screening tests.

No: Triage tests were used or unclear.

**9. Was the length of the shortest prevalence period for the parameter of interest appropriate?**

Yes: all studies were considered adequate. This is a crucial question in the prevalence of diabetic retinopathy in children and young people.

**10. Were the numerator(s) and denominator(s) for the parameter of interest appropriate and confidence interval given?**

Yes: Confidence interval given.

No: Confidence interval not given.

**11. Was the sample size equal or greater than 200?**

Yes.

No.
